# Supplementary material
Source: PubMed Central journal article supplement (PMC2974595)

**Table S1. Sequence of staining with antibodies and dyes**

**Table S2. List of primary antibodies**

**Table S3. List of secondary antibodies and dyes**

**Table S4. Patient characteristics**

**Table S5. Comparison of cell counts from 3D images and flow cytometry analysis**

**Figure S1. Visualization of normal human BM**

BM wholemount specimens from human healthy donors were fluorescently labeled with various combinations of two lineage-specific antibodies and DAPI (nuclei). Each confocal image is shown with a higher magnification view in the inset. (A) CD3<sup>+</sup> T cells (red) in lower number than CD20<sup>+</sup> B cells (green) appear scattered in the tissue. (B) CD33<sup>+</sup> myeloid cells (red) in high number are dispersed together with CD20<sup>+</sup> B cells. (C) Single, large megakaryocytes (green) are surrounded by numerous small platelets (green), both expressing CD41. (D) GPA<sup>+</sup> erythrocytes and erythroid precursors (green) form small clusters dispersed throughout the BM. (E) CD34<sup>+</sup> cells lined blood vessels (green) but also appear singly, scattered in the tissue, some co-expressing CD20 (yellow). Scale bars in  $\mu\text{m}$ .

**Figure S2. Autofluorescence and control experiments**

BM tissue exhibits low autofluorescence at 488-nm excitation (A) or 361-nm (B) respectively. The visible signal comes from the outer bone structure; becomes detectable only under much stronger laser illumination and higher voltage-values applied to the imaging detectors compared to instrument settings used for imaging fluorescently-stained samples. Isotype control image (C) with the corresponding DAPI image (D) was captured at instrument settings identical to those used for the specific stained sample.

**Figure S3. Bone structures visualized in brightfield images**

Panels (A–D) illustrate brightfield images of the mouse (A–B) and human (C–D) tissue; to aid visualization of the bone, the hematopoietic tissue was outlined and bone structures identified by asterisks (\*). Panels E and F from fluorescently labeled samples have bone area demarcated by hashed lines.

**Table S1. Sequence of staining with antibodies and dyes**

| Fig No. | 1st Step | 2nd Step                         | 3rd Step                         | 4th Step  |        |
|---------|----------|----------------------------------|----------------------------------|-----------|--------|
| 2       | B/C      | perlecan + DAR-FITC              | APC-CD45R                        | DAPI      |        |
|         | D/E      | perlecan + DAR-FITC              | APC-CD45R                        | DAPI      |        |
| 3       | A/B/C    | CollagenIV+DARb-FITC             | DAPI                             |           |        |
|         | E        | CollagenIV+DARb-FITC             | Biotin-CD34 + Str-Rhodamine RedX | DAPI      |        |
| 4       | A        | CD3e + GAAH-FITC                 | APC-CD45R                        |           |        |
|         | B        | CD45R + DAR-FITC                 | APC-CD11b                        |           |        |
|         | C        | CD41 + DAR-FITC                  | APC-CD45R                        |           |        |
|         | D        | TER-119 + DAR-FITC               | APC-CD45R                        |           |        |
|         | E        | perlecan + DAR-FITC              | APC-CD45R                        |           |        |
|         | F        | Biotin-cKit + Str-Rhodamine RedX | FITC-Sca1                        |           |        |
| 5       | A        | Biotin-perlecan + Str-APC        | FITC-CD8a                        | DAPI      |        |
|         | C        | Biotin-perlecan + Str-APC        | DAPI                             | BODIPY    |        |
| 6       | A        | perlecan + DAR-Rhodamine RedX    | Hoechst33342                     |           |        |
|         | C        | perlecan + DAR-Rhodamine RedX    | Hoechst33342                     |           |        |
| 7       | A        | CD146 + DAM-Rhodamine RedX       | Biotin-CD34 + Str-APC            | DAPI      | BODIPY |
|         | B        | CD146 + DAM-Rhodamine RedX       | DAPI                             |           |        |
|         | C        | CD34 + DAM-Rhodamine RedX        | FITC-CD33                        | DAPI      |        |
|         | D        | CD33 + DAM-FITC                  | Biotin-CD34 + Str-Rhodamine RedX | DAPI      |        |
|         | E        | CD20 + DAM-FITC                  | APC-CD38                         | DAPI      |        |
|         | F        | CD3 + DAM-Rhodamine RedX         | Biotin-CD8 + Str-APC             | FITC-CD20 | DAPI   |
| 8       | A/C      | CD146 + DAM-Rhodamine RedX       | Biotin-CD34 + Str-APC            | DAPI      | BODIPY |

"+" , indirectly conjugated; "-" , directly conjugated; "DAR" , donkey anti-rat; "DAM" , donkey anti-mouse  
"DARb" , Donkey anti-rabbit; "GAAH" , goat anti-Armenian hamster; "Str" , streptavidin.

**Table S2. List of primary antibodies**

| Antigen       | Type | Clone      | Description                                                                                                                                        | Manufacture        |
|---------------|------|------------|----------------------------------------------------------------------------------------------------------------------------------------------------|--------------------|
| <b>Human</b>  |      |            |                                                                                                                                                    |                    |
| CD3           | MM   | HIT3a      | T cells, thymocytes                                                                                                                                | BD Pharmingen      |
| CD5           | MM   | 4C7        | Thymocytes, mature T cells, subset of B cells                                                                                                      | abcam              |
| CD8a          | MM   | HIT8a      | Subpopulation of mature T cells, NK cells, thymocytes                                                                                              | eBiosciences       |
| CD20          | MM   | 2H7        | Developing B cells, mature B cells (not plasma cells)                                                                                              | eBiosciences       |
| CD33          | MM   | CLB-MD33.6 | Myeloid cells, macrophage precursors                                                                                                               | abcam Inc          |
| CD34          | MM   | QBEnd-10   | Hematopoietic progenitors, endothelial cells                                                                                                       | Beckman Coulter    |
| CD36          | MM   | FA6-152    | Collagen, phospholipids, erythroid cells                                                                                                           | abcam              |
| CD38          | MM   | HIT2       | Thymocytes, activated T cells, terminally differentiated B-cells (plasma cells)                                                                    | BD Pharmingen      |
| CD41          | MM   | HIP8       | Megakaryocytes, platelets                                                                                                                          | eBiosciences       |
| CD146         | MM   | NCL-146    | Stromal cells, fibroblasts, endothelial cells                                                                                                      | Leica Microsystems |
| GPA           | RM   | YTH89.1    | Erythroid cells                                                                                                                                    | Santa Cruz         |
| <b>Mouse</b>  |      |            |                                                                                                                                                    |                    |
| CD3e          | AHM  | 145-2C11   | Mature T cells, thymocytes, NK cells                                                                                                               | BD Pharmingen      |
| CD4           | RM   | RM4-5      | Subpopulation of mature T cells, thymocytes, subset of NK cells                                                                                    | BD Pharmingen      |
| CD8a          | RM   | 53-6.7     | Subpopulation of mature T cells, thymocytes                                                                                                        | eBiosciences       |
| CD11b         | RM   | M1/70      | granulocytes, macrophages, NK cells, activated lymphocytes                                                                                         | eBiosciences       |
| CD16/32       | RM   | 2.4G2      | NK cells, monocytes, macrophages, dendritic cells, Kupffer cells, granulocytes, mast cells, B cells, immature thymocytes, activated mature T cells | BD Pharmingen      |
| CD34          | RM   | RAM34      | Capillary endothelial cells, bone marrow stroma, a small subpopulation of mouse bone marrow cells                                                  | eBiosciences       |
| CD41          | RM   | MWReg30    | Megakaryocytes, platelets                                                                                                                          | abcam              |
| CD45R/B220    | RM   | RA3-6B2    | B-cells, NK cell precursors                                                                                                                        | BD Pharmingen      |
| Sca1          | RM   | E13-161.7  | Hematopoietic progenitors, B cells, myeloid cells                                                                                                  | BD Pharmingen      |
| cKit          | RM   | 2B8        | Hematopoietic progenitors, mast cells                                                                                                              | eBiosciences       |
| Gr-1          | RM   | RB6-8C5    | Granulocytes, monocytes                                                                                                                            | BD Pharmingen      |
| Ter-119       | RM   | Ter-119    | Erythroid cells                                                                                                                                    | BD Pharmingen      |
| HSP2/perlecan | RM   | A7L6       | Basement membranes, endothelial cells                                                                                                              | abcam              |
| Collagen IV   | RbP  | polyclonal | Basement membranes                                                                                                                                 | AbD Serotec        |

MM, mouse monoclonal; RM, rat monoclonal; AHM, Armenian hamster monoclonal; RbP, rabbit polyclonal.

**Table S3. List of secondary antibodies and dyes**

| Species | Type                         | Fluorescence    | Description | Manufacture                          |
|---------|------------------------------|-----------------|-------------|--------------------------------------|
| DAM     | F(ab') <sub>2</sub> fragment | FITC            |             | Jackson ImmunoResearch Laboratories  |
| DAM     | F(ab') <sub>2</sub> fragment | Rhodamine Red-X |             | Jackson ImmunoResearch Laboratories  |
| DAM     | F(ab') <sub>2</sub> fragment | Cy5             |             | Jackson ImmunoResearch Laboratories  |
| DAR     | F(ab') <sub>2</sub> fragment | FITC            |             | Jackson ImmunoResearch Laboratories  |
| DAR     | F(ab') <sub>2</sub> fragment | Rhodamine Red-X |             | Jackson ImmunoResearch Laboratories  |
| DAR     | F(ab') <sub>2</sub> fragment | Cy5             |             | Jackson ImmunoResearch Laboratories  |
| DARb    | F(ab') <sub>2</sub> fragment | FITC            |             | Jackson ImmunoResearch Laboratories  |
| GAAH    | F(ab') <sub>2</sub> fragment | FITC            |             | Jackson ImmunoResearch Laboratories  |
|         | Streptavidin                 | DTAF            |             | Jackson ImmunoResearch Laboratories  |
|         | Streptavidin                 | Rhodamine Red-X |             | Jackson ImmunoResearch Laboratories  |
|         | Streptavidin                 | APC             |             | Jackson ImmunoResearch Laboratories  |
|         |                              | DAPI            | Nuclei      | Invitrogen Corporation, Carlsbad, CA |
|         |                              | Hoechst33342    | Nuclei      | Invitrogen Corporation, Carlsbad, CA |
|         |                              | BODIPY          | Lipid       | Invitrogen Corporation, Carlsbad, CA |

DAM, donkey anti-mouse IgG; DAR, donkey anti-rat IgG; DARb, donkey anti-rabbit IgG; GAAH, goat anti-Armenian hamster IgG.

**Table S4. Patient characteristics**

| <b>Fig No.</b> | <b>Diagnosis</b>                                  | <b>Age</b> | <b>Sex</b> | <b>Status</b>  | <b>Pathological Reading</b>                                                                                                                                             |
|----------------|---------------------------------------------------|------------|------------|----------------|-------------------------------------------------------------------------------------------------------------------------------------------------------------------------|
| 7 A/B          | Severe aplastic anemia (SAA)                      | 24         | M          | Pre-treatment  | Markedly hypocellular bone marrow with severe trilineage hypoplasia.                                                                                                    |
| 7C             | Acute myeloid leukemia (AML)                      | 75         | M          | Pre-treatment  | CD34 stain highlights frequent CD34-positive cells approximately 20-25% of marrow cells.                                                                                |
| 7 D            | Chronic myeloid leukemia blast crisis (CML-BC)    | 48         | F          | Post-treatment | Marrow heavily infiltrated with pleomorphic myeloid blasts.                                                                                                             |
| 7 E            | Multiple myeloma (MM)                             | 43         | F          | Pre-treatment  | There are numerous clusters of mature plasma cells present throughout the marrow. The plasma cells comprise approximately 30% of marrow cells.                          |
| 7 F            | T-cell Large granular lymphocyte leukemia (T-LGL) | 82         | M          | Pre-treatment  | There are moderate numbers of CD3 positive cells without abnormal collections and similar numbers of CD8 positive cells are present. There were only rare CD20 positive |
| 8 A            | Severe aplastic anemia (SAA)                      | 67         | F          | Post-treatment | The sample varied focally from 5-50% in cellularity with overall cellularity 20%.                                                                                       |
| 8 D            | Severe aplastic anemia (SAA)                      | 28         | M          | Post-treatment | Marrow of variable cellularity with decreased megakaryocytes.                                                                                                           |

**Table S5. Comparison of cell counts from 3D images and flow cytometry analysis**

| Fig No.   | Antigen   | number from 3D image | % from image | % by FACS |
|-----------|-----------|----------------------|--------------|-----------|
| 4A        | CD3       | 73                   | 2.5          | 2.6       |
|           | CD45R     | 685                  | 23.7         | 22.4      |
|           | nuclei    | 2896                 |              |           |
| 4B        | CD11b     | 924                  | 26.6         | 21.9      |
|           | nuclei    | 3743                 |              |           |
| 4C        | CD41      | 84                   | 2.1          | N/A       |
|           | nuclei    | 4080                 |              |           |
| 4D        | Ter119    | 330                  | 31.3         | 23.5      |
|           | nuclei    | 1055                 |              |           |
| 4F        | cKit+Sca1 | 1                    | 0.1          | 0.1       |
|           | nuclei    | 1019                 |              |           |
| 5A day 7  | CD8       | 49                   | 3.1          | 2.6       |
|           | nuclei    | 1595                 |              |           |
| 5A day 10 | CD8       | 620                  | 11           | 8         |
|           | nuclei    | 5627                 |              |           |
| 5A day 17 | CD8       | 1228                 | 24.8         | 25.2      |
|           | nuclei    | 4946                 |              |           |
| 6A day 1  | GFP+      | 95                   | 4.6          | 5.5       |
|           | nuclei    | 2058                 |              |           |
| 6A day 7  | GFP+      | 1437                 | 37.3         | 38.6      |
|           | nuclei    | 3849                 |              |           |
| 6A day 28 | GFP+      | 3537                 | 65.8         | 72.4      |
|           | nuclei    | 5378                 |              |           |
| 6C day 7  | GFP+      | 46                   | 4.3          | 5.5       |
|           | nuclei    | 1078                 |              |           |
| 6C day 14 | GFP+      | 169                  | 17.1         | 18.1      |
|           | nuclei    | 989                  |              |           |
| 6C day 28 | GFP+      | 1240                 | 47.2         | 48        |
|           | nuclei    | 2624                 |              |           |
| S1A       | CD3       | 170                  | 12.6         | 35.7      |
|           | CD20      | 27                   | 2            | 1.8       |
|           | nuclei    | 1354                 |              |           |
| S1B       | CD33      | 345                  | 18           | 6.7       |
|           | nuclei    | 1915                 |              |           |
| S1E       | CD34      | 17                   | 0.8          | 1.3       |
|           | nuclei    | 2039                 |              |           |

"FACS", Flow cytometry.

Takaku et al., Figure S1

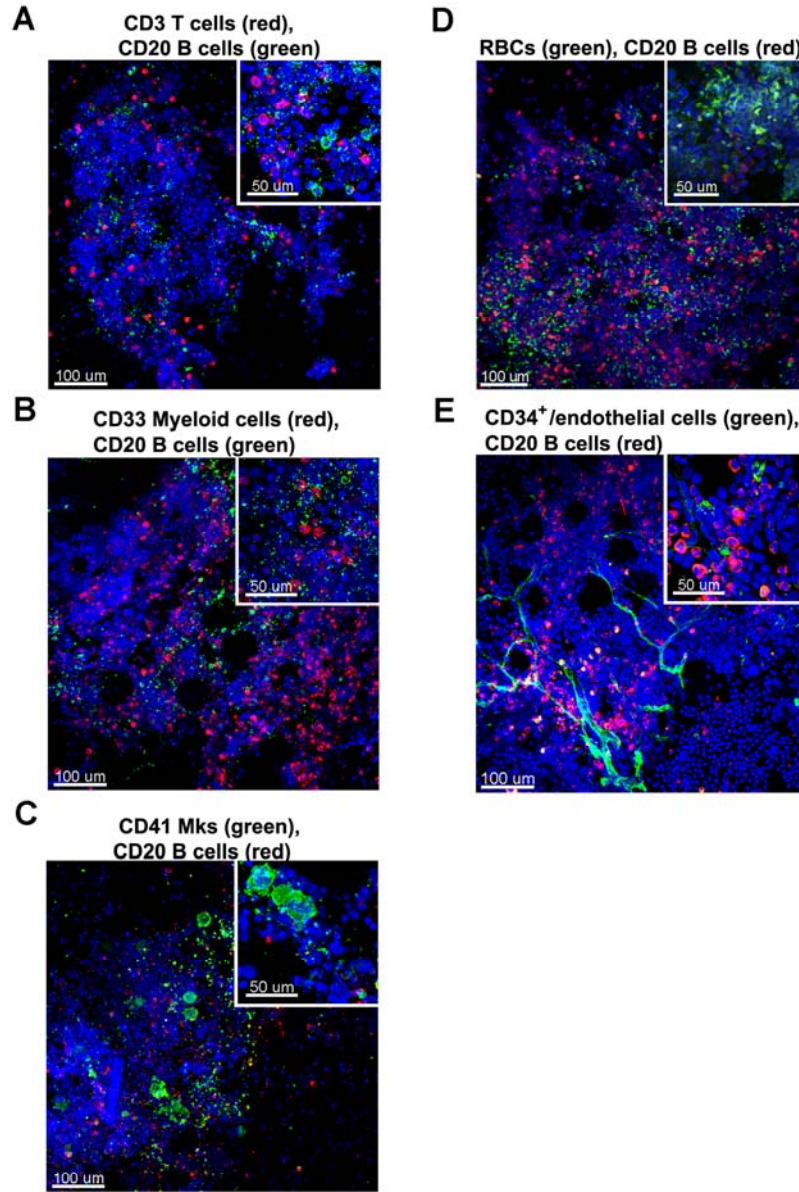

Normal human

Takaku et al., Figure S2

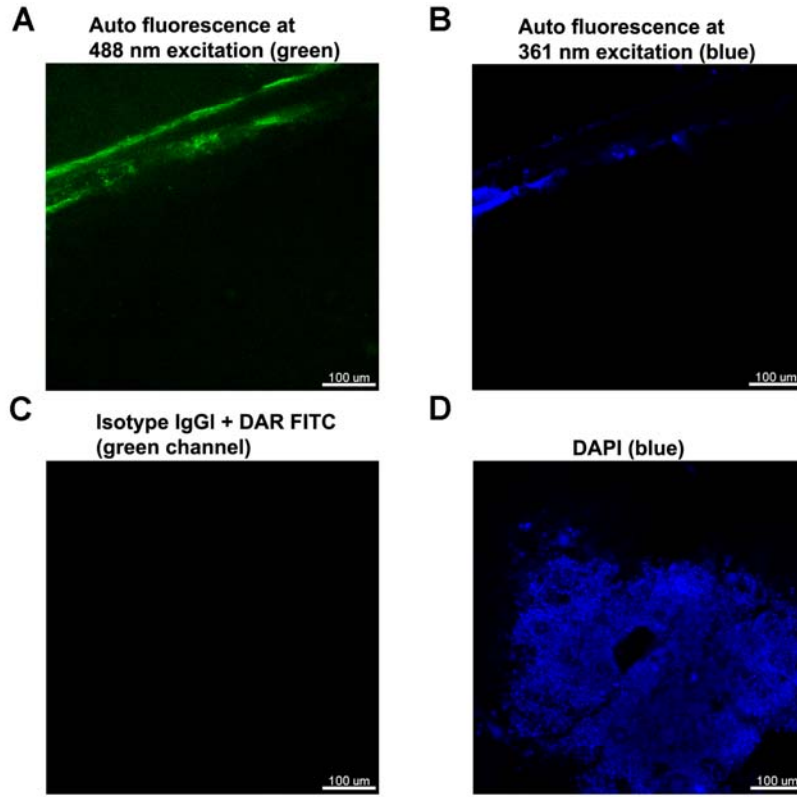



Takaku et al., Figure S3

**A** Bright field Mouse BM image  
Original

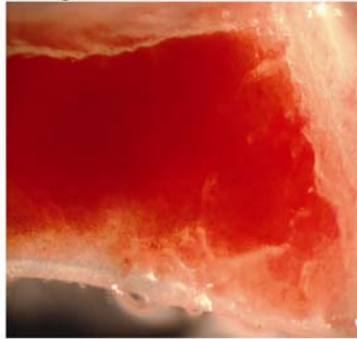

**B** With bone location

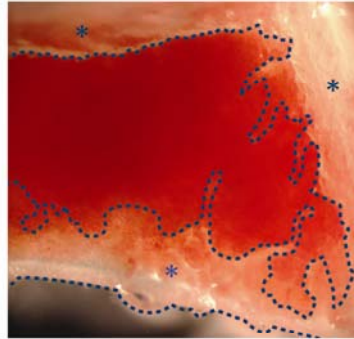

**C** Bright field Human BM image  
Original

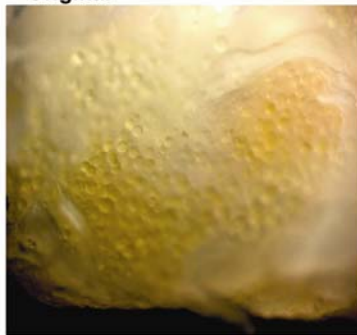

**D** With bone location

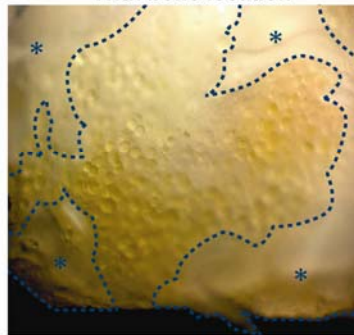

**E** CD8 T cells (green),  
matrix (white), nuclei (blue)

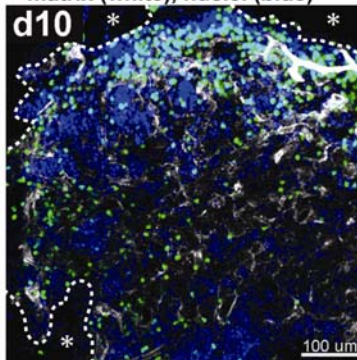

**F** Adipocytes (green), matrix (white),  
nuclei (blue)

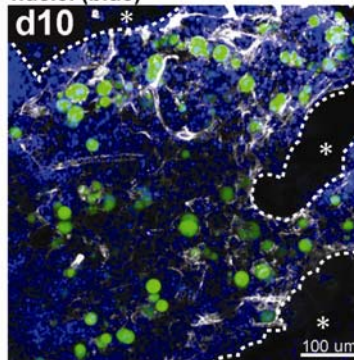

Supplement: blood-2010-02-268466_1.pdf [file blood-2010-02-268466_1.pdf]
